# Supplementary material
Source: publisher site journal article supplement (https://www.dovepress.com/get_supplementary_file.php?f=507586.docx)
Supplement: Supplementary file 1 [file get_supplementary_file.php]

Supplementary Table 1 Univariate analysis of factors influencing the slope of quantitative Neuropad

| Variable | β(95%CI) | SE | T-value | P-value |
| --- | --- | --- | --- | --- |
| Female[case(%)] | -0.347(-0.869,0.174) | 0.266 | -1.305 | 0.192 |
| Age (years) | -0.066(-0.085,-0.048) | 0.009 | -7.090 | <0.001 |
| BMI(kg/m2) | 0.116(0.031,0.200) | 0.043 | 2.672 | 0.008 |
| Waist circumference (cm) | 0.028(0.002,0.054) | 0.013 | 2.126 | 0.034 |
| SBP (mmHg) | -0.020(-0.033,-0.007) | 0.007 | -2.992 | 0.003 |
| DBP (mmHg) | -0.017(-0.039,0.004) | 0.011 | -1.570 | 0.116 |
| Alcohol history[yes(%)] | 0.676(0.100,1.252) | 0.294 | 2.303 | 0.021 |
| Smoking history[yes(%)] | 0.505(-0.091,1.101) | 0.304 | 1.662 | 0.097 |
| Hypertension  history[yes(%)] | -0.866(-1.457,-0.275) | 0.301 | -2.873 | 0.004 |
| glycemic status group |  |  |  |  |
| -Normoglycemia | 0.0(reference) |  |  |  |
| -Prediabetes | -0.118(-0.781,0.545) | 0.338 | -0.348 | 0.728 |
| -Newly diagnosed diabetes | -0.688(-1.647,0.271) | 0.489 | -1.406 | 0.160 |
| -Previously diagnosed diabetes | -1.765(-2.666,-0.864) | 0.459 | -3.842 | <0.001 |
| TSH（mIU/L） | -0.058(-0.230,0.114) | 0.088 | -0.658 | 0.510 |
| ALT（U/L） | 0.005(-0.015,0.025) | 0.010 | 0.520 | 0.603 |
| AST（U/L） | -0.007(-0.036,0.021) | 0.015 | -0.489 | 0.625 |
| Total protein（g/L） | 0.008(-0.063,0.079) | 0.036 | 0.219 | 0.827 |
| Albumin（g/L） | 0.277(0.152,0.402) | 0.064 | 4.344 | <0.001 |
| Globulin（g/L） | -0.091(-0.168,-0.014) | 0.039 | -2.324 | 0.020 |
| Creatinine（μmol/L） | -0.003(-0.021,0.016) | 0.009 | -0.302 | 0.762 |
| Uric acid（mmol/L） | 0.000(-0.004,0.003) | 0.002 | -0.303 | 0.762 |
| eGFR（ml·min－1） | 0.052(0.034,0.069) | 0.009 | 5.768 | <0.001 |
| RBC（10^12/L） | 0.132(-0.036,0.301) | 0.086 | 1.541 | 0.123 |
| HGB（g/L） | 0.009(-0.008,0.026) | 0.009 | 1.011 | 0.312 |
| PLT（10^9/L） | 0.003(-0.001,0.008) | 0.002 | 1.487 | 0.137 |
| TG（mmol/L） | -0.099(-0.231,0.033) | 0.067 | -1.470 | 0.142 |
| TC（mmol/L） | -0.220(-0.479,0.040) | 0.132 | -1.661 | 0.097 |
| HDL-C（mmol/L） | -0.553(-1.269,0.162) | 0.365 | -1.517 | 0.129 |
| LDL-C（mmol/L） | -0.076(-0.415,0.263) | 0.173 | -0.439 | 0.660 |

**Notes:** BMI, body mass index; SBP, systolic blood pressure;DBP, diastolic blood pressure;TSH,thyroid-stimulating hormone; ALT,alanine aminotransferase; AST,aspartate aminotransferase; eGFR,estimated glomerular filtration rate; RBC,red blood cell; HGB,hemoglobin; PLT,platelet; TG,triglyceride; TC,total cholesterol; HDL-C,high-density lipoprotein cholesterol; LDL-C,low-density lipoprotein cholesterol.*P* < 0.05

Supplementary Table 2 Univariate analysis of factors influencing the slope of Visual Neuropad

| Variable | β | SE | Wald χ2 | P-value | OR(95%CI) |
| --- | --- | --- | --- | --- | --- |
| Female[case(%)] | 0.353 | 0.184 | 3.684 | 0.055 | 1.423(0.993,2.039) |
| Age (years) | 0.033 | 0.007 | 21.267 | <0.001 | 1.034(1.019,1.049) |
| BMI(kg/m2) | -0.078 | 0.031 | 6.475 | 0.011 | 0.925(0.871,0.982) |
| Waist circumference (cm) | -0.028 | 0.010 | 8.413 | 0.004 | 0.973(0.954,0.991) |
| SBP (mmHg) | 0.006 | 0.005 | 1.801 | 0.180 | 1.006(0.997,1.016) |
| DBP (mmHg) | -0.002 | 0.008 | 0.074 | 0.786 | 0.998(0.983,1.013) |
| Alcohol history[yes(%)] | -0.542 | 0.205 | 6.999 | 0.008 | 0.582(0.389,0.869) |
| Smoking history[yes(%)] | -0.413 | 0.210 | 3.856 | 0.050 | 0.662(0.438,0.999) |
| Hypertension  history[yes(%)] | 0.221 | 0.209 | 1.115 | 0.291 | 1.248(0.827,1.881) |
| glycemic status group |  |  |  |  |  |
| -Normoglycemia |  |  |  |  | 1.0(reference) |
| -Prediabetes | 0.019 | 0.235 | 0.006 | 0.937 | 1.019(0.642,1.616) |
| -Newly diagnosed diabetes | 0.194 | 0.341 | 0.323 | 0.570 | 1.214(0.622,2.369) |
| -Previously diagnosed diabetes | 0.941 | 0.348 | 7.285 | 0.007 | 2.561(1.294,5.071) |
| TSH（mIU/L） | 0.019 | 0.060 | 0.100 | 0.752 | 1.019(0.905,1.147) |
| ALT（U/L） | 0.001 | 0.007 | 0.014 | 0.906 | 1.001(0.987,1.014) |
| AST（U/L） | 0.006 | 0.010 | 0.305 | 0.581 | 1.006(0.986,1.026) |
| Total protein（g/L） | 0.001 | 0.025 | 0.003 | 0.955 | 1.001(0.954,1.051) |
| Albumin（g/L） | -0.139 | 0.046 | 8.979 | 0.003 | 0.870(0.794,0.953) |
| Globulin（g/L） | 0.057 | 0.028 | 4.258 | 0.039 | 1.059(1.003,1.117) |
| Creatinine（μmol/L） | -0.006 | 0.006 | 0.797 | 0.372 | 0.994(0.982,1.007) |
| Uric acid（mmol/L） | -0.001 | 0.001 | 0.782 | 0.377 | 0.999(0.997,1.001) |
| eGFR（ml·min－1） | -0.023 | 0.007 | 12.042 | 0.001 | 0.977(0.965,0.990) |
| WBC（10^9/L） | -0.122 | 0.060 | 4.125 | 0.042 | 0.885(0.787,0.996) |
| RBC（10^12/L） | -0.586 | 0.194 | 9.121 | 0.003 | 0.557(0.381,0.814) |
| HGB（g/L） | -0.010 | 0.006 | 2.553 | 0.110 | 0.990(0.978,1.002) |
| PLT（10^9/L） | -0.002 | 0.002 | 1.208 | 0.272 | 0.998(0.995,1.001) |
| TG（mmol/L） | 0.020 | 0.048 | 0.185 | 0.667 | 1.021(0.930,1.121) |
| TC（mmol/L） | 0.035 | 0.091 | 0.149 | 0.699 | 1.036(0.867,1.238) |
| HDL-C（mmol/L） | 0.638 | 0.256 | 6.189 | 0.013 | 1.893(1.145,3.129) |
| LDL-C（mmol/L） | -0.060 | 0.119 | 0.257 | 0.612 | 0.942(0.746,1.189) |

**Notes:** BMI, body mass index; SBP, systolic blood pressure;DBP, diastolic blood pressure;TSH,thyroid-stimulating hormone; ALT,alanine aminotransferase; AST,aspartate aminotransferase; eGFR,estimated glomerular filtration rate; WBC,white blood cell; RBC,red blood cell; HGB,hemoglobin; PLT,platelet; TG,triglyceride; TC,total cholesterol; HDL-C,high-density lipoprotein cholesterol; LDL-C,low-density lipoprotein cholesterol.*P* < 0.05
